# Supplementary material
Source: MDPI journal article supplement (https://www.mdpi.com/2079-6412/12/8/1201)
Supplement: s1 [file s1]

# Supplementary Materials: Novel Terahertz Properties of Nanostructured $\text{Mn}_{3+0.53}\text{Sn}$ Films with Different Crystalline Orientations Driven by Ostwald Ripening on (0001) $c\text{-Al}_2\text{O}_3$

Shaopeng Yang <sup>1,†</sup>, Xinyue Wang <sup>1,†</sup>, Qiuji Wang <sup>2,†</sup>, Tong Xu <sup>1</sup>, Qian Wang <sup>1</sup>, Jin Guo <sup>1</sup>, Jian Zuo <sup>1</sup>, Cunlin Zhang <sup>1</sup>, Wen Xu <sup>2,\*</sup>, Yujun Song <sup>3,\*</sup>, Ying Liu <sup>4</sup>, Jing Wang <sup>5</sup> and Hai Wang <sup>1,\*</sup>

<sup>1</sup> Department of Physics, Capital Normal University, Beijing 100048, China

<sup>2</sup> School of Physics and Astronomy, Yunnan University, Kunming 650091, China

<sup>3</sup> Center for Modern Physics Technology, School of Mathematics and Physics, University of Science and Technology Beijing, Beijing 100083, China

<sup>4</sup> College of Chemistry, Beijing Normal University, Beijing 100875, China

<sup>5</sup> School of Physical Sciences, University of Chinese Academy of Sciences, Beijing 100190, China

\* Correspondence: wenxu\_issp@aliyun.com (W.X.); songyj@ustb.edu.cn (Y.S.); wanghai@cnu.edu.cn (H.W.)

† These authors contributed equally to this work.

**Citation:** Yang, S.; Wang, X.; Wang, Q.; Xu, T.; Wang, Q.; Guo, J.; Zuo, J.; Zhang, C.; Xu, W.; Song, Y.; et al. Novel Terahertz Properties of Nanostructured  $\text{Mn}_{3+0.53}\text{Sn}$  Films with Different Crystalline Orientations Driven by Ostwald Ripening on (0001)  $c\text{-Al}_2\text{O}_3$ . *Coatings* **2022**, *12*, 1201. <https://doi.org/10.3390/coatings12081201>

Academic Editor: Francesco Di Quarto

Received: 28 June 2022

Accepted: 7 August 2022

Published: date

**Publisher's Note:** MDPI stays neutral with regard to jurisdictional claims in published maps and institutional affiliations.

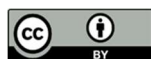

**Copyright:** © 2022 by the authors. Submitted for possible open access publication under the terms and conditions of the Creative Commons Attribution (CC BY) license (<https://creativecommons.org/licenses/by/4.0/>).

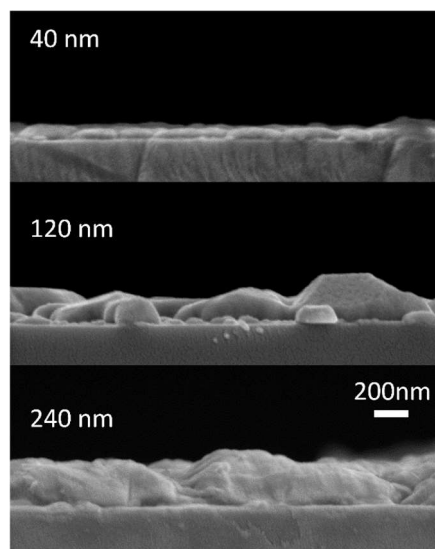

**Figure S1.** Cross-sectional SEM images of  $\text{Mn}_{3+0.53}\text{Sn}$  films. From top to bottom, the images are corresponding to S4 (40 nm), S6 (120 nm) and S1 (240 nm), respectively.

## Note:

The growth of  $\text{Mn}_{3.53}\text{Sn}$  film on  $\text{Al}_2\text{O}_3$  (0001) surface is very similar to a well-known Stranski - Krastanow (SK) mode. (The surface morphology of S1 and S4 can be found in the main text). The SK mechanism describes the emerge of islands under elastic stress due to lattice mismatch between the two materials at the initial stage of growth. The most important role in describing the growth of epitaxial nanostructures by the SK mode is played by the concepts of critical thickness of the transition from two-dimensional to three-dimensional growth [1].

However, there is a small lattice mismatch between (0001)  $c\text{-Al}_2\text{O}_3$  and (0001)  $\text{Mn}_3\text{Sn}$ . And a 120 nm thick  $\text{Mn}_3\text{Sn}$  film (S6) still exist in an island morphology. The critical thickness is far beyond the one described in SK mechanism. Discontinuous surface morphology was observed even in samples with a thickness of 300 nm. Such being the case, the role of Ostwald Ripening during the film growth cannot be overlooked. The situation is more prominent in the case of a large difference between the melting points of alloy components while the temperature of phase formation of alloy is much higher than one of them, e.g., Mn and Sn.

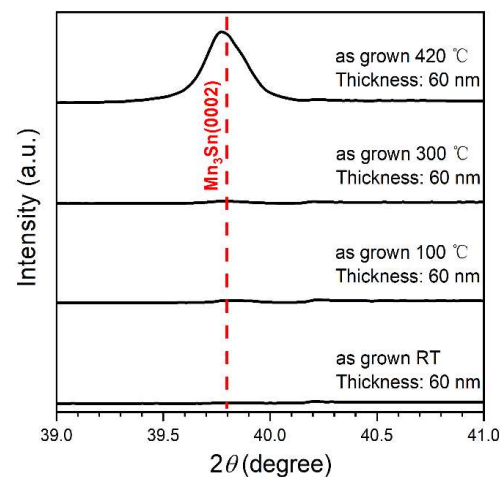

**Figure S2.** Structural characterization of 60 nm  $\text{Mn}_{3+0.53}\text{Sn}$  films deposited at different substrate temperature. From the top to the bottom, they are S7, S8, S9 and S10.

Note:

A strong (0002)  $\text{Mn}_3\text{Sn}$  peak is observed in S7 without any noticeable impurity peaks. However, there is no diffraction peak belonging to P63/MMC  $\text{Mn}_3\text{Sn}$  in S8, S9 and S10 (Figure S2). It suggests that the phase formation temperature of  $\text{Mn}_3\text{Sn}$  nanofilms is 420 °C, which is consistent with literatures (~300–500 °C).

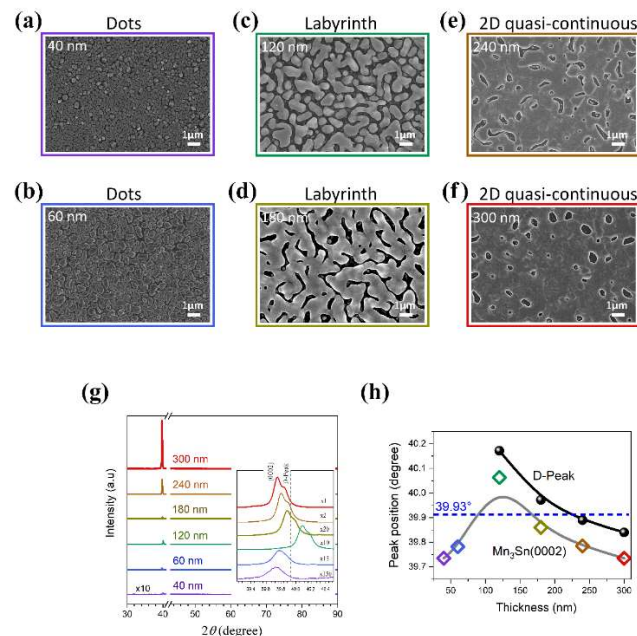

**Figure S3.** Structural evolution of II-type  $\text{Mn}_{3+0.53}\text{Sn}$  films with different thickness. SEM images of  $\text{Mn}_{3+0.53}\text{Sn}$  films, (a) S11 (40 nm), (b) S7 (60 nm), (c) S12(120 nm), (d) S13 (180 nm), (e) S14 (240 nm) and (f) S15 (300 nm). (g) XRD pattern of the samples in (a–f). The insert one is the details around the (0002) peak of  $\text{Mn}_3\text{Sn}$  (39.20°–40.45°), from which a distortion peak (D peak) can be observed at the right side of (0002) peak while the thickness is larger than 120 nm. (h) The position of the two peaks versus film thickness. The dash line for standard value of  $\text{Mn}_3\text{Sn}$  (0002) is also drawn together.

Note:

The nanomorphology of polycrystalline II-type  $\text{Mn}_3\text{Sn}$  films evolve from nanodot and labyrinth to 2D quasi-continuous film with the increase of film thickness, which

suggests strongly the role of OR. The abnormal shift of both (0002) and D peak indicates a controllable lattice distortion in nanostructured  $\text{Mn}_3\text{Sn}$  films.

**Table S1.** List of samples on (0001)  $c\text{-Al}_2\text{O}_3$  without seed layer.

| Sample Pool | Thickness | Status  | Grown Temperature | Post-annealing Conditions | Relevant Figures                                         |
|-------------|-----------|---------|-------------------|---------------------------|----------------------------------------------------------|
| S1          | 240 nm    | //-type | 420 °C            | NA                        | Figure 2a,b<br>Figure S1                                 |
| S2          | 240 nm    | N       | 100 °C            | NA                        | Figure 2c,d                                              |
| S3          | 240 nm    | ⊥-type  | 100 °C            | 5h@450 °C                 | Figure 2d–f                                              |
| S4          | 40 nm     | ⊥-type  | 420 °C            | NA                        | Figure 3a,b,d<br>Figure 4b–d<br>Figure 5a–d<br>Figure S1 |
| S5          | 40 nm     | //-type | 420 °C            | 10h@450 °C                | Figure 3c,d<br>Figure 4a,c,d<br>Figure 5a–d              |
| S6          | 120 nm    | //-type | 420 °C            | NA                        | Figure S1                                                |
| S7          | 60 nm     | //-type | 420 °C            | 5h@450 °C                 | Figure S2<br>Figure S3b,g,h                              |
| S8          | 60 nm     | N       | 300 °C            | 5h@450 °C                 | Figure S2                                                |
| S9          | 60 nm     | N       | 100 °C            | 5h@450 °C                 | Figure S2                                                |
| S10         | 60 nm     | N       | RT                | 5h@450 °C                 | Figure S2                                                |
| S11         | 40 nm     | //-type | 420 °C            | 5h@450 °C                 | Figure S3a,g,h                                           |
| S12         | 120 nm    | //-type | 420 °C            | 5h@450 °C                 | Figure S3c,g,h                                           |
| S13         | 180 nm    | //-type | 420 °C            | 5h@450 °C                 | Figure S3d,g,h                                           |
| S14         | 240 nm    | //-type | 420 °C            | 5h@450 °C                 | Figure S3e,g,h                                           |
| S15         | 300 nm    | //-type | 420 °C            | 5h@450 °C                 | Figure S3f,g,h                                           |

## References

1. Lozovoy, K. Comparative analysis of germanium-silicon quantum dots formation on Si(100), Si(111) and Sn/Si(100) surfaces. *Nanotechnology*. **2018**, *29*, 054002.
